# Supplementary material for: Identification of Novel Chromosomal Aberrations Induced by 60Co-γ-Irradiation in Wheat-Dasypyrum villosum Lines
Source: Int J Mol Sci. 2015 Dec 14;16(12):29787–96. doi: 10.3390/ijms161226134 (PMC4691081; doi:10.3390/ijms161226134)
Supplement: Supplementary file 1 [file ijms-16-26134-s001.pdf]

# Supplementary Materials: Identification of Novel Chromosomal Aberrations Induced by $^{60}\text{Co}$ - $\gamma$ -irradiation in Wheat-*Dasypyrum villosum* Lines

Jie Zhang, Yun Jiang, Yuanlin Guo, Guangrong Li, Zujun Yang, Delin Xu and Pu Xuan

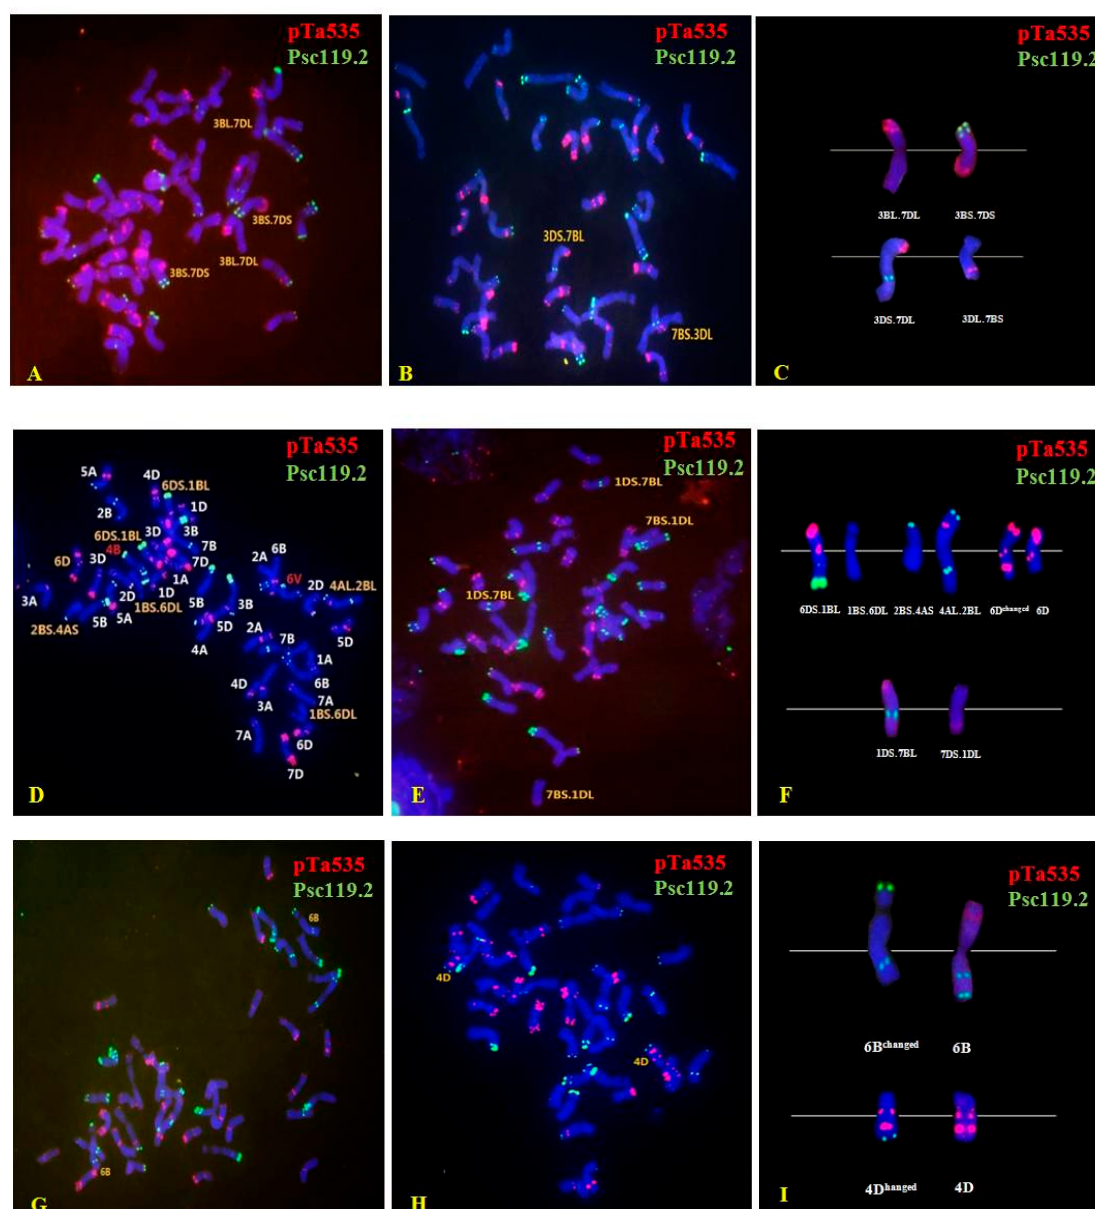

**Figure S1.** FISH, using pTa535 (red) and pSc119.2 (green) as probes, for chromosomes with structural changes and number mutant plants from the M<sub>1</sub> generation. (A) 3B.7D translocation; (B) 3D.7D translocation; (D) 1B.6D and 4A.2B translocations, 4B and 6V monosomes; (E) 1D.7B translocation; (G) 6B aberrance; (H) 4D aberrance; (C,F,I) Enlargement of the FISH pattern of the chromosomes involved in the structural change. Chromosomes were counterstained with 4'-6-diamidino-2-phenylindole (blue).

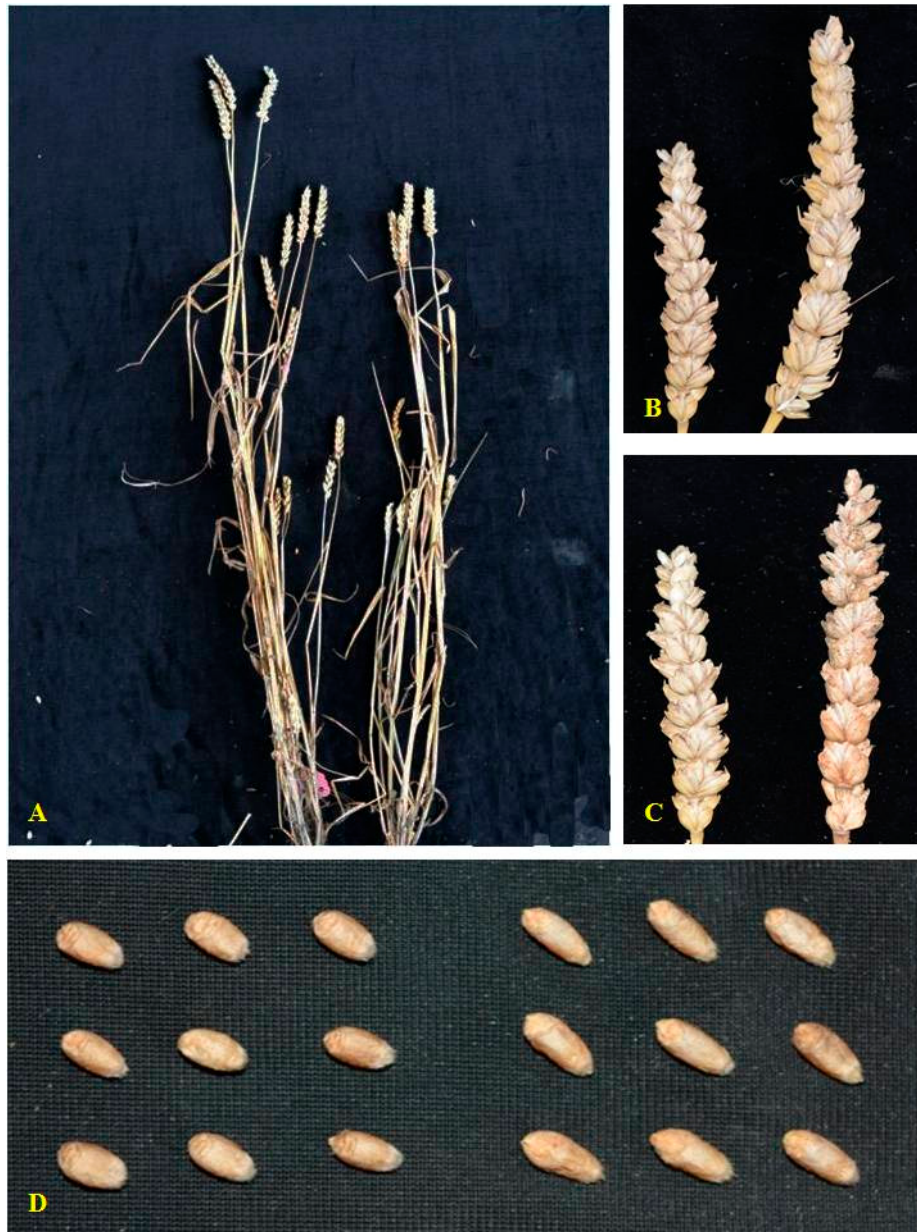

**Figure S2.** Themorphology of plants in  $M_1$  generation. (A) Dwarf plant (4B.1D translocation); (B,C) Long spikes (c is 6B.3D translocation); (D) Long seeds. The plant (A), spike (B,C), seeds (D) on the left are of control check (CK, untreated WD14), and those on the right are from a treated plant possessing favorable traits.
